# Supplementary material for: Polycystin-1 Surface Localization Is Stimulated by Polycystin-2 and Cleavage at the G Protein-coupled Receptor Proteolytic Site
Source: PubMed Central journal article supplement — Mol Biol Cell. 2010 Dec 15;21(24):4338–48. doi: 10.1091/mbc.E10-05-0407 (PMC3002387; doi:10.1091/mbc.e10-05-0407), 2010-12-15

**Supplementary Figure 1:** Transfected cells that express exogenous PC1 also express exogenous PC2. Cells co-transfected with the indicated plasmids were surface-labeled with the anti-Flag antibody and then, post-permeabilization, with a polyclonal anti-c-Myc antibody directed against the c-Myc-tagged PC2 construct (A). Cells with surface PC1 expression (arrows in A, upper panels) were also positive for PC2 expression (A, middle panels). A few cells only expressed PC2 and had no signal from anti-Flag surface antibody (arrowheads, A). To determine whether cells in a co-transfected population would only express PC1, anti-Flag antibody recognizing PC1 and anti-c-Myc antibody recognizing PC2 were added to permeabilized cells and low-magnification images of large cell populations were taken. There was no background labeling from the anti-c-Myc antibody in cells that expressed PC1 alone (B, left middle panel), and cells were most likely to express both PC1 and PC2 (arrows) or solely PC2 (arrowheads).

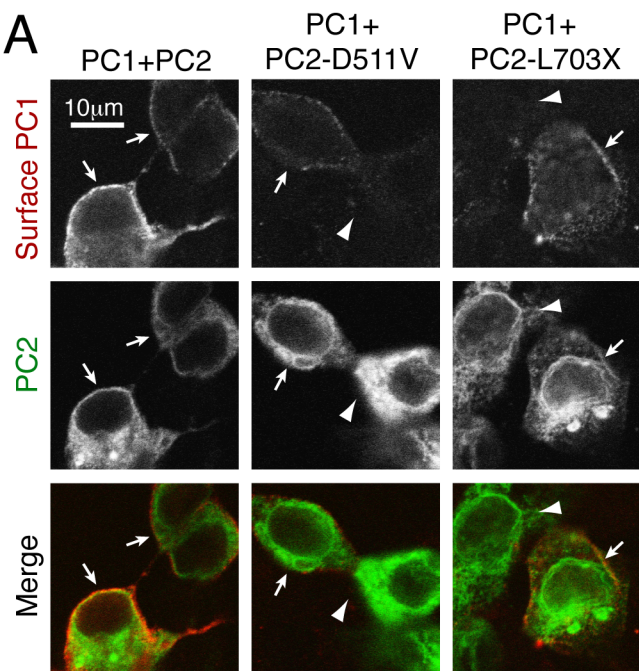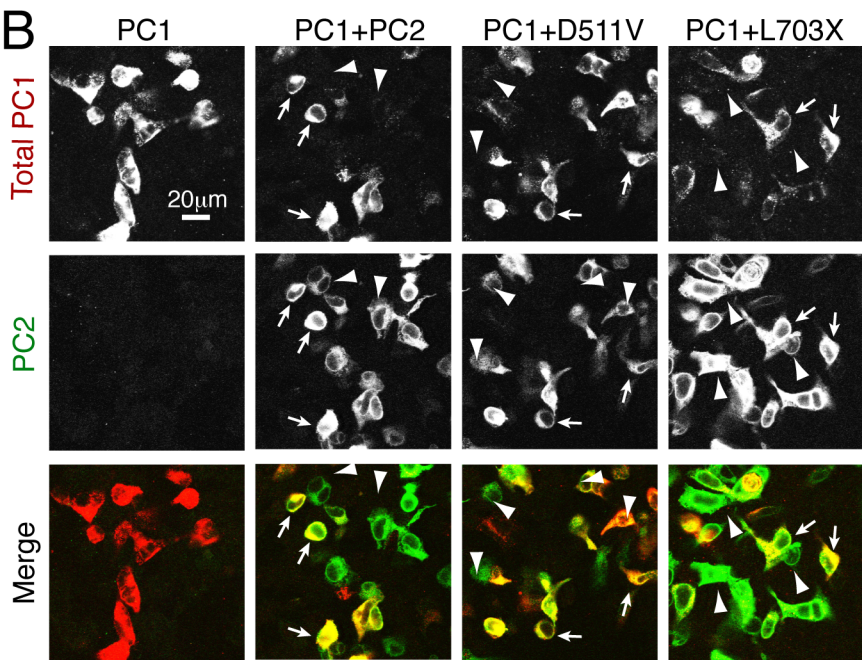

Supplement: E10-05-0407_1.pdf [file E10-05-0407_1.pdf]
